# Supplementary material
Source: Springer Nature journal article supplement (https://www.springermedizin.de/resource/supplementary/12907_2012_110_MOESM2_ESM.pdf/9524666)
Supplement: MOESM2 [file 9524666]

N

## Spoligopatterns

SIT

Label

| N  | Spoligopatterns | SIT | Label      |
|----|-----------------|-----|------------|
| 48 |                 | 52  | T2         |
| 12 |                 | 125 | T2         |
| 8  |                 | 420 | T2         |
| 8  |                 | 135 | T2-Uganda  |
| 6  |                 | NA  | NA         |
| 5  |                 | 53  | T1         |
| 4  |                 | 59  | LAM11-ZWE  |
| 4  |                 | NA  | NA         |
| 3  |                 | NA  | NA         |
| 3  |                 | 128 | T2         |
| 2  |                 | 175 | T2         |
| 2  |                 | NA  | NA         |
| 2  |                 | NA  | NA         |
| 2  |                 | 26  | CAS1_DELHI |
| 2  |                 | NA  | NA         |
| 2  |                 | 590 | T2         |
| 2  |                 | NA  | NA         |
